# Supplementary material
Source: publisher site journal article supplement (https://www.dovepress.com/get_supplementary_file.php?f=401385.docx)
Supplement: Supplementary file 1 [file get_supplementary_file.php]

**Supplemental tables**

**Table S1** Primers used for qRT-PCR assay

| **Gene names** | **Forward/Reverse** | **Sequences 5'-3'** |
| --- | --- | --- |
|
| Mouse-Mas1 | Forward | CATCTAGGACTGGGCAGAGC |
| Reverse | AGTCAGGAGGTGGAGAGCAA |
| Mouse-β-actin | Forward | TGAGCTGCGTTTTACACCCT |
| Reverse | GCCTTCACCGTTCCAGTTTT |
| Mouse-miR-5126 | Forward | GGTCCGCGGGCGGGGCCGGGGGCGGGG |
| Reverse | CCAGTGCAGGGTCCGAGGT |
| Mouse-miR-489-3p | Forward | GGTCCAATGACACCACATATATGGCAGC |
| Reverse | CCAGTGCAGGGTCCGAGGT |
| Mouse-miR-145a-5p | Forward | GGTCCGTCCAGTTTTCCCAGGAATCCCT |
| Reverse | CCAGTGCAGGGTCCGAGGT |
| Mouse-miR-224-5p | Forward | GGTCCTAAGTCACTAGTGGTTCCGTT |
| Reverse | CCAGTGCAGGGTCCGAGGT |
| Mouse-IL-1β | Forward | CTTCAGGCAGGCAGTATC |
| Reverse | CCAGCAGGTTATCATCATCA |
| Mouse-IL-6 | Forward | ACAAAGCCAGAGTCCTTCAGAG |
| Reverse | CATTGGAAATTGGGGTAGGA |
| Mouse-TNF-α | Forward | GTCTACTGAACTTCGGGGTGAT |
| Reverse | ATGATCTGAGTGTGAGGGTCTG |

**Table S2** Sequences used for [cell](javascript:;) [transfection](javascript:;)

| **Names** | **Sequences 5'-3'** |
| --- | --- |
| Mouse-NC mimic | GGCUCUAGAAAAGCCUAUGC |
| Mouse-miR-224-5p mimic | UAAGUCACUAGUGGUUCCGUU |
| Mouse-NC inhibitor | CAGUACUUUUGUGUAGUACAAA |
| Mouse-miR-224-5p inhibitor | AACGGAACCACUAGUGACUUA |

**Supplemental figures**


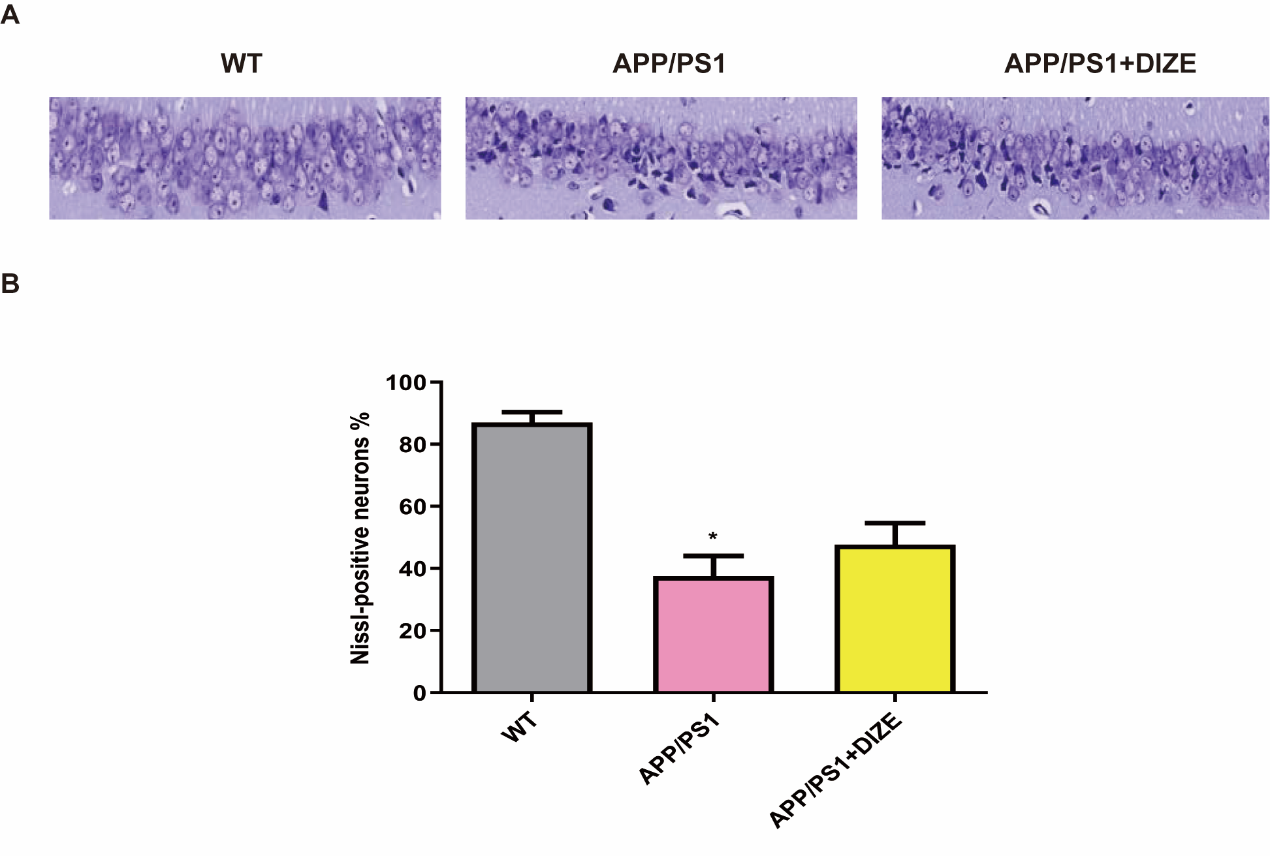


**Supplementary Figure. 1** (A) Neuronal loss in the hippocampus of mice was detected by Nissl staining. Neurons with dark violet nucleus and intact morphology were identified as Nissl-positive neurons. Scale bar=100 μm (n = 6 per group). (B) Quantitative statistics of Nissl-positive neurons. All data are expressed as means ± SD. **P* < 0.05 versus the WT group.
